# Supplementary material
Source: PubMed Central journal article supplement (PMC3471708)
Supplement: supp_M112.376814_jbc.M112.376814-1.pdf [file supp_M112.376814_jbc.M112.376814-1.pdf]

## SUPPLEMENTAL DATA

### Video Legend

Video 1. **Syndecan-1 restrains migration speed.** Injured B2b<sup>shRNA.scr</sup> and B2b<sup>shRNA.hSdc1</sup> cells were observed by time-lapse TIRF microscopy using a Nikon TiE inverted widefield fluorescence microscope. Each time point was acquired every 20 minutes for 10 hours. Scale bar = 20  $\mu$ m. Time = hr:min.

Video 2. **The transmembrane domain slows migration of lung epithelial cells.** Migration of injured B2b<sup>shRNA.scr</sup> cells transduced with eGFP, B2b<sup>shRNA.hSdc1</sup> cells transduced with eGFP, and B2b<sup>shRNA.hSdc1</sup> cells co-transduced with eGFP and mutant mouse syndecan-1 cDNA was observed using a Nikon TiE inverted widefield fluorescence microscope. Each time point was acquired every 20 minutes for 10 hours. Scale bar = 20  $\mu$ m. Time = hr:min.

## Supplemental Figures

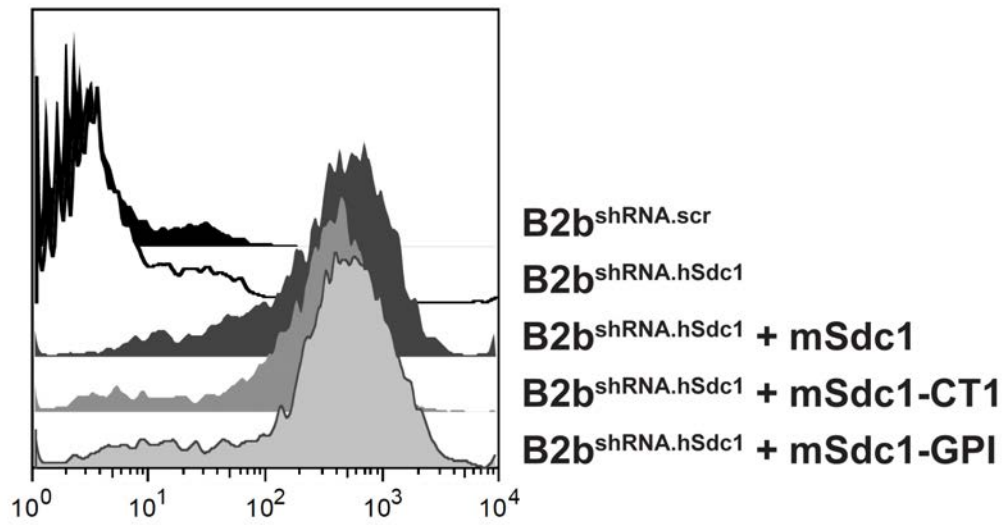

Figure S1. **Expression levels of mouse syndecan-1 in B2b<sup>shRNA.hSdc1</sup> cells.** B2b<sup>shRNA.hSdc1</sup> cells expressing full-length or mutant mSdc1 were immunostained for flow cytometry with a PE-conjugated anti-mouse syndecan-1 antibody (clone 281.2). Because the 281.2 antibody does not cross-react with human syndecan-1, B2b<sup>shRNA.scr</sup> and B2b<sup>shRNA.hSdc1</sup> cells were used as negative controls.

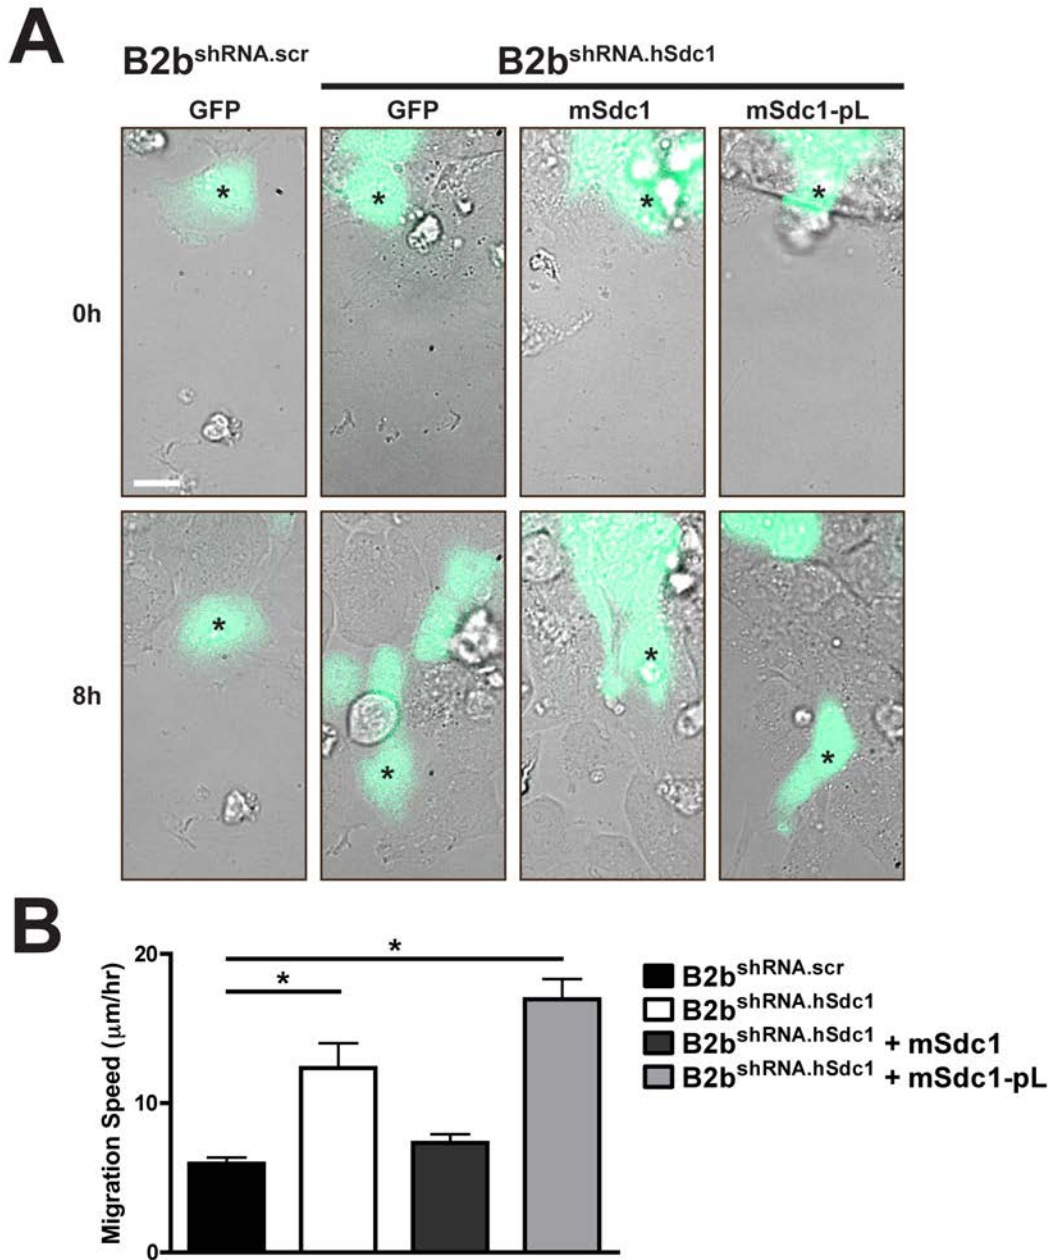

Figure S2. **Poly-leucine substitution of the transmembrane domain does not slow cell migration.**  
**A.** B2b<sup>shRNA.scr</sup> and B2b<sup>shRNA.hSdc1</sup> cells transduced as labeled were injured, and migration of eGFP cells was observed. The black asterisk identifies the same cell at 0h and 8h after injury. Scale bar = 20 µm.  
**B.** Migration speed of all conditions. Control conditions expressed only eGFP and were compared to conditions co-expressing both mouse syndecan-1 and eGFP. \**p* < 0.01.
